# Supplementary material for: Isothermal Drying Kinetic Study of Spent Coffee Grounds Using Thermogravimetric Analysis
Source: Hindawi journal article supplement (doi:10.1155/2022/2312147), 2022-01-01
Supplement: f1 [file 2312147.f1.doc]

**Isothermal drying kinetic study of spent coffee grounds using thermogravimetric analysis**

**Victoria Bejenari, Cătălin Lisa***, **Corina Cernătescu, Ioan Mămăligă*, Gabriela Lisa***

*Gheorghe Asachi Technical University of Iasi, Faculty of Chemical Engineering and Environmental Protection “Cristofor Simionescu”, 73 Prof.dr.doc D. Mangeron Street, Iasi 700050, Romania*

*Corresponding authors

Telephone and Fax: **+40 - 232 271311**

E-mail address: [clisa@ch.tuiasi.ro (C](mailto:clisa@ch.tuiasi.ro (Catalin)ătălin Lisa), imamalig@ch.tuiasi.ro (Ioan Mămăligă), [gabriela.lisa@academic.tuiasi.ro](mailto:gabriela.lisa@academic.tuiasi.ro) (Gabriela Lisa)

**Running title:** Drying spent coffee grounds in isothermal conditions

The Scanning Electron Microscopy (SEM) technique was used to investigate the morphology of the spent coffee grounds samples. A scanning electronic microscope Quanta 200 was used.

| 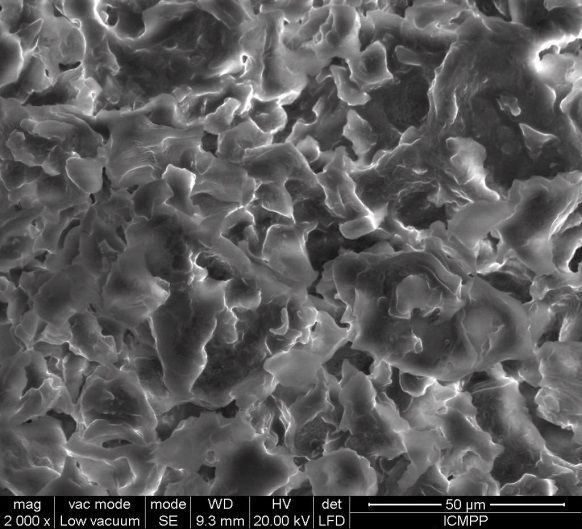 | 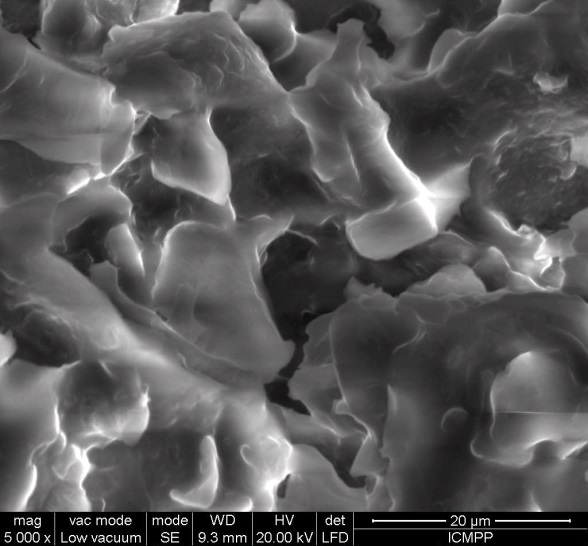 |
| --- | --- |
| a) 2000x | b) 5000x |

*Fig S1.SEM images of dry coffee grounds particles*

The determination of the particle size distribution of the spent coffee grounds was performed using the Anton Paar PSA 1190 analyzer in dry dispersion mode.


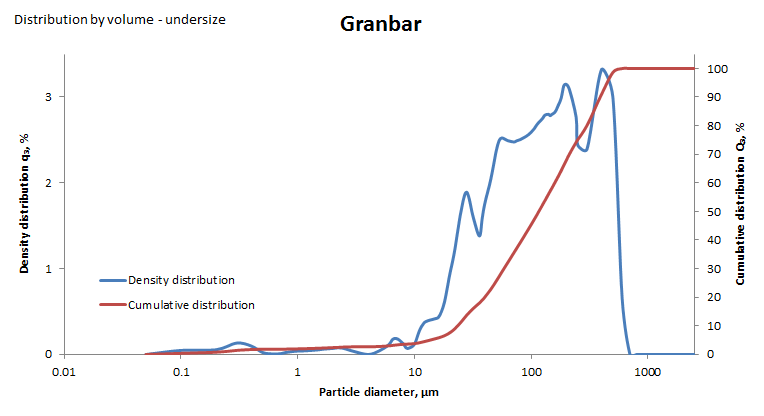


*Fig S2. The density or frequency distribution (q3) and the cumulative curve (Q3)*

The study of the water holding capacity for spent coffee grounds was performed under static conditions.

Table S1. The results obtained for the three sets of experimental determinations

| Experiment number | g water/g dry material |
| --- | --- |
| 1 | 3.54 |
| 2 | 3.90 |
| 3 | 3.87 |
